# Supplementary material for: Association of Staphylococcal Populations on Teatcups of Milking Parlours with Vaccination against Staphylococcal Mastitis in Sheep and Goat Farms
Source: Pathogens. 2021 Mar 24;10(4):385. doi: 10.3390/pathogens10040385 (PMC8063832; doi:10.3390/pathogens10040385)
Supplement: Supplementary file 1 [file pathogens-10-00385-s001.pdf]

# Staphylococcal Populations on Teatcups of Milking Parlours in Sheep and Goat Farms and Associations with Vaccination Against Staphylococcal Mastitis

Charalambia K. Michael, Daphne T. Lianou, Natalia G.C. Vasileiou, Katerina Tsilipounidaki, Angeliki I. Katsafadou, Antonis P. Politis, Nikos G. Kordalis, Katerina S. Ioannidi, Dimitris A. Gougoulis, Constantina Trikalinou, Denise C. Orfanou, Ilektra A. Fragkou, Panagiota I. Kontou, Dimitra V. Liagka, Vasia S. Mavrogianni, Efthimia Petinaki and George C. Fthenakis

**Table S1.** Identity of staphylococcal isolates recovered from teatcups of milking parlours in sheep flocks ( $n=12$ ) during a longitudinal study (4 visits) and their frequency of recovery.

| Upper part of teatcups ( $n=39$ ) |   | Lower part of teatcups ( $n=17$ ) |   |
|-----------------------------------|---|-----------------------------------|---|
| Species                           | n | Species                           | n |
| 1 <sup>st</sup> visit             |   |                                   |   |
| <i>S. aureus</i>                  | 2 | <i>S. equorum</i>                 | 1 |
| <i>S. capitis</i>                 | 1 | <i>S. haemolyticus</i>            | 1 |
| <i>S. equorum</i>                 | 1 | <i>S. lentus</i>                  | 1 |
| <i>S. haemolyticus</i>            | 1 |                                   |   |
| <i>S. lentus</i>                  | 1 |                                   |   |
| <i>S. sciuri</i>                  | 1 |                                   |   |
| <i>S. simulans</i>                | 1 |                                   |   |
| 2 <sup>nd</sup> visit             |   |                                   |   |
| <i>S. aureus</i>                  | 1 | <i>S. aureus</i>                  | 1 |
| <i>S. capitis</i>                 | 2 | <i>S. capitis</i>                 | 1 |
| <i>S. equorum</i>                 | 2 | <i>S. equorum</i>                 | 1 |
| <i>S. lentus</i>                  | 1 | <i>S. lentus</i>                  | 1 |
| <i>S. pettenkoferi</i>            | 1 |                                   |   |
| <i>S. saprophyticus</i>           | 1 |                                   |   |
| <i>S. sciuri</i>                  | 1 |                                   |   |
| <i>S. simulans</i>                | 1 |                                   |   |
| 3 <sup>rd</sup> visit             |   |                                   |   |
| <i>S. aureus</i>                  | 1 | <i>S. aureus</i>                  | 1 |
| <i>S. capitis</i>                 | 1 | <i>S. capitis</i>                 | 1 |
| <i>S. equorum</i>                 | 4 | <i>S. xylosus</i>                 | 1 |
| <i>S. lentus</i>                  | 2 |                                   |   |
| <i>S. sciuri</i>                  | 1 |                                   |   |
| <i>S. warneri</i>                 | 1 |                                   |   |
| <i>S. xylosus</i>                 | 1 |                                   |   |
| 4 <sup>th</sup> visit             |   |                                   |   |
| <i>S. aureus</i>                  | 1 | <i>S. aureus</i>                  | 1 |
| <i>S. capitis</i>                 | 1 | <i>S. equorum</i>                 | 2 |
| <i>S. equorum</i>                 | 2 | <i>S. lentus</i>                  | 2 |
| <i>S. lentus</i>                  | 2 | <i>S. sciuri</i>                  | 1 |
| <i>S. saprophyticus</i>           | 1 | <i>S. simulans</i>                | 1 |

---

|                    |   |
|--------------------|---|
| <i>S. sciuri</i>   | 1 |
| <i>S. simulans</i> | 2 |

---

**Table S2.** Summary of characteristics of 321 farms included into a cross-sectional study in Greece regarding staphylococcal populations on teatcups of milking parlours.

| <b>Geographical part of the country, where farms were located <sup>1</sup></b> | <b>n</b> |
|--------------------------------------------------------------------------------|----------|
| Central part of the country                                                    | 134      |
| Islands of the country                                                         | 36       |
| North part of the country                                                      | 90       |
| South part of the country                                                      | 61       |
| <b>Management system applied in the farms <sup>2</sup></b>                     | <b>n</b> |
| Intensive management system                                                    | 52       |
| Semi-intensive management system                                               | 158      |
| Semi-extensive management system                                               | 106      |
| Extensive management system                                                    | 5        |
| <b>Animal species farmed</b>                                                   | <b>n</b> |
| Sheep                                                                          | 255      |
| Goats                                                                          | 66       |
| <b>Number of female animals in the farms</b>                                   | <b>n</b> |
| <165                                                                           | 91       |
| 166-330                                                                        | 106      |
| 331-500                                                                        | 71       |
| 501-830                                                                        | 38       |
| >830                                                                           | 15       |

<sup>1</sup> Central part: includes the administrative regions of Continental Greece and Thessaly, as well as the division of Aetolia-Acarnania of the administrative region of Western Greece and the divisions of Arta and Preveza of the administrative region of Epirus; Islands part: includes the administrative regions of Crete, Ionian islands, North Aegean and South Aegean; North part includes the administrative regions of Central Macedonia, Eastern Macedonia and Thrace and Western Macedonia, as well as the divisions of Ioannina and Thesprotia of the administrative region of Epirus; South part: includes the administrative regions of Attica and Peloponnese, as well as the divisions of Achaia and Elis of the administrative region of Western Greece.

<sup>2</sup> Classification according to the European Food Safety Authority system (European Food Safety Authority. Scientific opinion on the welfare risks related to the farming of sheep for wool, meat and milk production. *EFSA J.* **2014**, *12*, 3933-4060).

**Table S3.** Summary of characteristics of 12 sheep farms included into a longitudinal study in Greece regarding staphylococcal populations on teatcups of milking parlours.

| <b>Geographical part of the country, where farms were located <sup>1</sup></b> | <b>n</b> |
|--------------------------------------------------------------------------------|----------|
| Central part of the country                                                    | 0        |
| Islands of the country                                                         | 0        |
| North part of the country                                                      | 0        |
| South part of the country                                                      | 12       |
| <b>Management system applied in the farms <sup>2</sup></b>                     | <b>n</b> |
| Intensive management system                                                    | 1        |
| Semi-intensive management system                                               | 8        |
| Semi-extensive management system                                               | 3        |
| Extensive management system                                                    | 0        |
| <b>Number of female animals in the farms</b>                                   | <b>n</b> |
| <165                                                                           | 3        |
| 166-330                                                                        | 8        |
| 331-500                                                                        | 0        |
| 501-830                                                                        | 1        |
| >830                                                                           | 0        |

<sup>1</sup> Central part: includes the administrative regions of Continental Greece and Thessaly, as well as the division of Aetolia-Acarnania of the administrative region of Western Greece and the divisions of Arta and Preveza of the administrative region of Epirus; Islands part: includes the administrative regions of Crete, Ionian islands, North Aegean and South Aegean; North part includes the administrative regions of Central Macedonia, Eastern Macedonia and Thrace and Western Macedonia, as well as the divisions of Ioannina and Thesprotia of the administrative region of Epirus; South part: includes the administrative regions of Attica and Peloponnese, as well as the divisions of Achaia and Elis of the administrative region of Western Greece.

<sup>2</sup> Classification according to the European Food Safety Authority system (European Food Safety Authority. Scientific opinion on the welfare risks related to the farming of sheep for wool, meat and milk production. *EFSA J.* **2014**, *12*, 3933-4060).

**Table S4.** Details of vaccines recorded to be in use in Greece against staphylococcal mastitis, during a countrywide investigation in sheep and goat farms.

| Vaccine | Commercial name | Animal species for which licenced | Immunological component active against staphylococcal mastitis <sup>1</sup>                                             |
|---------|-----------------|-----------------------------------|-------------------------------------------------------------------------------------------------------------------------|
| I       | Mastivet        | Cattle                            | ≥10 <sup>8</sup> c.f.u. inactivated whole-cell <i>S. aureus</i>                                                         |
| II      | Ovax            | Sheep                             | 160 c.f.u. inactivated whole-cell <i>S. aureus</i><br>a-staphylococcal toxoid 120 HU<br>b-staphylococcal toxoid 2000 HU |
| III     | Vimco, Startvac | Cattle, Sheep, Goats              | Bacterin of <i>S. aureus</i> strain, expressing the exopolysaccharide poly-N-acetylglucosamine (PNAG)                   |
| IV      | -               | -                                 | <i>S. aureus</i> autogenous vaccine prepared with an isolate from clinical mastitis diagnosed in animals of the farm    |

<sup>1</sup> Information drawn from the respective Summary of Product Characteristics
